# Supplementary material
Source: HighWire-hosted journal article supplement (https://emj.bmj.com/content/35/8/499)
Supplement: inline-supplementary-material-3 [file inline-supplementary-material-3.docx]

*This abstract has been translated and adapted from the original English-language content. Translated content is provided on an "as is" basis. Translation accuracy or reliability is not guaranteed or implied. BMJ is not responsible for any errors and omissions arising from translation to the fullest extent permitted by law, BMJ shall not incur any liability, including without limitation, liability for damages, arising from the translated text.*

**Samenvatting**

**Introductie** Veel patiënten die de spoedeisende hulp (SEH) bezoeken met buikpijn worden uiteindelijk ontslagen met de diagnose “aspecifieke buikpijn”. Vaak worden deze patiënten daags erna op de SEH teruggezien voor herbeoordeling van hun klachten. In deze studie hebben we onderzocht hoe vaak een dergelijk herbeoordelingsbezoek leidt tot een verandering in diagnose of behandeling, en welke factoren kunnen helpen om patiënten te identificeren die het meeste baat hebben bij een herbeoordeling

**Methode** Dit was een retrospectieve studie verricht in Nederland tussen 1 Januari 2014 en 31 December 2015 van patiënten aan wie gevraagd was om binnen 30 uur terug te komen naar de SEH voor herbeoordeling van hun klachten na een initiële presentatie op de SEH met buikpijn van niet-traumatische origine. De belangrijkste uitkomstmaat was het optreden van een klinisch relevante verandering in diagnose of behandeling (chirurgie, endoscopie en of ziekenhuisopname) ten tijde van het herbeoordelingsbezoek.

**Resultaten**  Gedurende de studieperiode van twee jaar werd aan 358 SEH patiënten gevraagd om terug te komen voor herbeoordeling, waarvan 14% [11-18%] niet kwam opdagen. Herbeoordeling resulteerde in een klinisch relevante verandering in diagnose- en behandeling in respectievelijk 21.3% [17-29%] en 22.3% [18-27%] van de patiënten. Van alle klinische, biochemische en radiologische factoren die beschikbaar waren ten tijde van het eerste SEH bezoek, voorspelde alleen de hoogte van het CRP een verandering in behandeling (CRP >27 mg/L LR+ 1.69 [1.21-2.36]). Een stijging in CRP van > 25 mg/L tussen het initiële- en het herbeoordelingsbezoek (LR+ 2.85 [1.88-4.32]) en het verrichten van beeldvormend onderzoek ten tijde van het herbeoordelingsbezoek (LR+ 3.05 [2.41-3.86]) waren beide geassocieerd met een verandering in behandeling.

**Conclusie** Herbeoordeling binnen 30 uur van patiënten die vanaf de SEH ontslagen worden met de werkdiagnose “aspecifieke buikpijn” leidt tot een klinisch relevante verandering in diagnose en beleid in bijna een kwart van de patiënten. Het bepalen van CRP ten tijde van het eerste SEH bezoek helpt om patiënten te identificeren die het meeste baat hebben bij een herbeoordeling. Beeldvormend onderzoek dient laagdrempelig verricht te worden ten tijde van het herbeoordelingsbezoek.
